# Supplementary material for: Interfacial structure of atomically flat polycrystalline Pt electrodes and modified Sauerbrey equation
Source: Royal Society of Chemistry journal article supplement (doi:10.1039/c7cp02528a), 2017-01-01
Supplement: c7cp02528a1.pdf [file c7cp02528a1.pdf]

## Electronic supplementary information

### Interfacial Structure of Atomically Flat Polycrystalline Pt Electrodes and Modified Sauerbrey Equation

Jutae Kim,<sup>a</sup> Patrick Urchaga,<sup>b</sup> Stève Baranton,<sup>b</sup> Christophe Coutanceau,<sup>b</sup> and Gregory Jerkiewicz\*<sup>a</sup>

<sup>a</sup>Department of Chemistry, Queen's University, 90 Bader Lane, Kingston, ON, K7L 3N6, Canada

<sup>b</sup>Institut de Chimie des Milieux et Matériaux de Poitiers (IC2MP), UMR CNRS 7285, Université de Poitiers, 4 rue Michel Brunet, TSA 51106, 86073, Poitiers Cedex 9, France

\*Corresponding author. Email: gregory.jerkiewicz@queensu.ca

The current density ( $j$ ) and the mass change ( $\Delta m$ ) values of cyclic-voltammetry (CV) and mass variation (MV) transients shown in [Figures 4A](#) and [4B](#) are divided by the corresponding values of the electrode roughness factor ( $R$ ). Such normalized plots, namely  $j/R$  versus  $E$  and  $\Delta m/R$  versus  $E$ , are presented in [Figures S1A](#) and [S1B](#), respectively. [Figure S1A](#) reveals that the CV profiles normalized for the roughness factor values overlap; the agreement is to  $\pm 1.9\%$ , which is within the experimental uncertainty. [Figure S1B](#) demonstrates that the MV transients normalized for the surface roughness factor do not overlap.

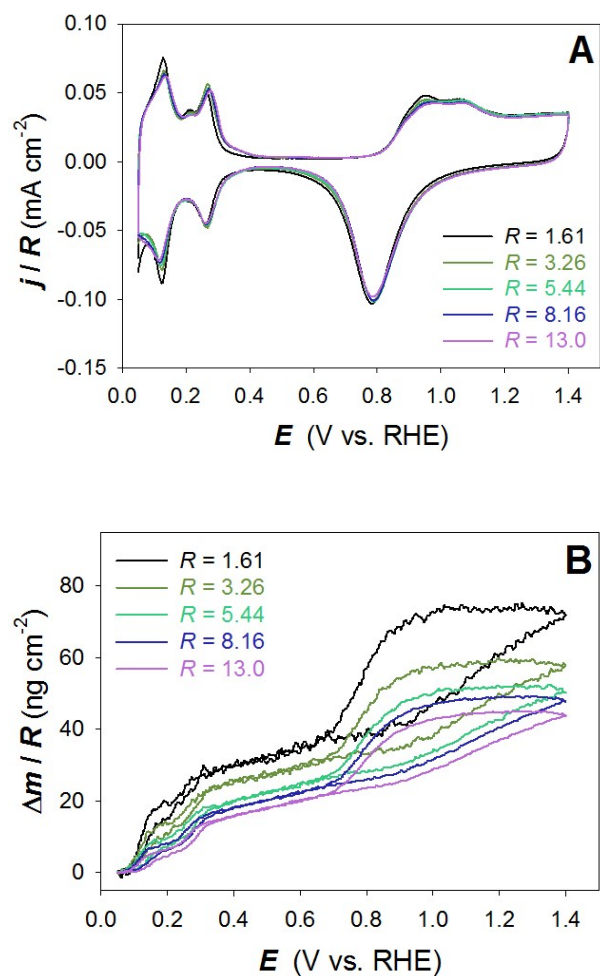

**Figure S1.** Series of roughness factor normalized CV profiles (A) and simultaneously recorded MV transients (B) for Pt electrodes of gradually increasing surface roughness ( $1.61 \leq R \leq 13.0$ ) acquired in 0.50 M aqueous H<sub>2</sub>SO<sub>4</sub> at a potential scan rate of  $s = 50 \text{ mV s}^{-1}$  and  $T = 298 \text{ K}$ .
